# Supplementary material
Source: PubMed Central journal article supplement (PMC9765015)
Supplement: aac.00392-22-s0001.pdf [file aac.00392-22-s0001.pdf]

1 **Targeting the artemisinin resistant malaria by repositioning of the anti-hepatitis C virus drug**  
2 **alisporivir**

3  
4

5 Ayushi Chaurasiya<sup>1#</sup>, Geeta Kumari<sup>1#</sup>, Swati Garg<sup>1</sup>, Rumaisha Shoaib<sup>1</sup>, Zille Anam<sup>1</sup>, Nishant  
6 Joshi<sup>2</sup>, Jyoti Kumari<sup>2</sup>, Jhalak Singhal<sup>1</sup>, Niharika Singh<sup>1</sup>, Shikha Kaushik<sup>1</sup>, Amandeep Kaur  
7 Kahlon<sup>1</sup>, Neha Dubey<sup>3</sup>, Mukesh Kumar Maurya<sup>1</sup>, Pallavi Srivastava<sup>1</sup>, Manisha Marothia<sup>1</sup>,  
8 Gobardhan Das<sup>1</sup>, Souvik Bhattacharjee<sup>1</sup>, Shailja Singh<sup>1\*</sup> and Anand Ranganathan<sup>1\*</sup>

9  
10

11 <sup>1</sup>Special Centre for Molecular Medicine, Jawaharlal Nehru University, New Delhi, 110067 India

12 <sup>2</sup>Department of Life Sciences, School of Natural Sciences, Shiv Nadar University, Greater Noida,  
13 Uttar Pradesh, 201304 India

14 <sup>3</sup>Department of Molecular Microbiology, Washington University in St. Louis, USA

15 # Co-first authors

16

17 Running title: Antimalarial repositioning of Alisporivir

18

19 Correspondence: anand.icgeb@gmail.com; shailja.jnu@gmail.com

20  
21  
22  
23  
24  
25  
26  
27  
28  
29

30

31 **TABLE S1** Primer sequences

|                              |                                           |
|------------------------------|-------------------------------------------|
| <i>PfCyclophilin 19B For</i> | 5'-AAGAATTCTACGTAACCTATTTTGATATAACTATC-3' |
| <i>PfCyclophilin 19B Rev</i> | 5'-AAGAATTCTACGTACAATGGCAATTCTCCTGATTC-3' |
| <i>Pf18S For</i>             | 5'-CCGCCCGTCGCTCCTACCG-3'                 |
| <i>Pf18S Rev</i>             | 5'-CCTTGTTACGACTTCTCCTTCC-3'              |

32

33

34

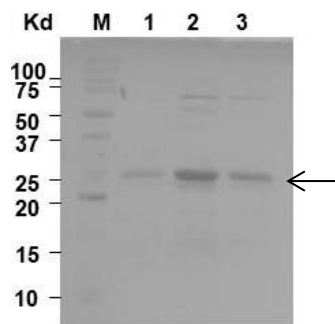

35

36 **Supplementary Fig 1.** SDS-PAGE gel of purified *PfCyclophilin 19B* protein. Lane (1-3) show  
37 purified recombinant *PfCyclophilin 19B* protein. Lane M shows the protein molecular weight  
38 marker.

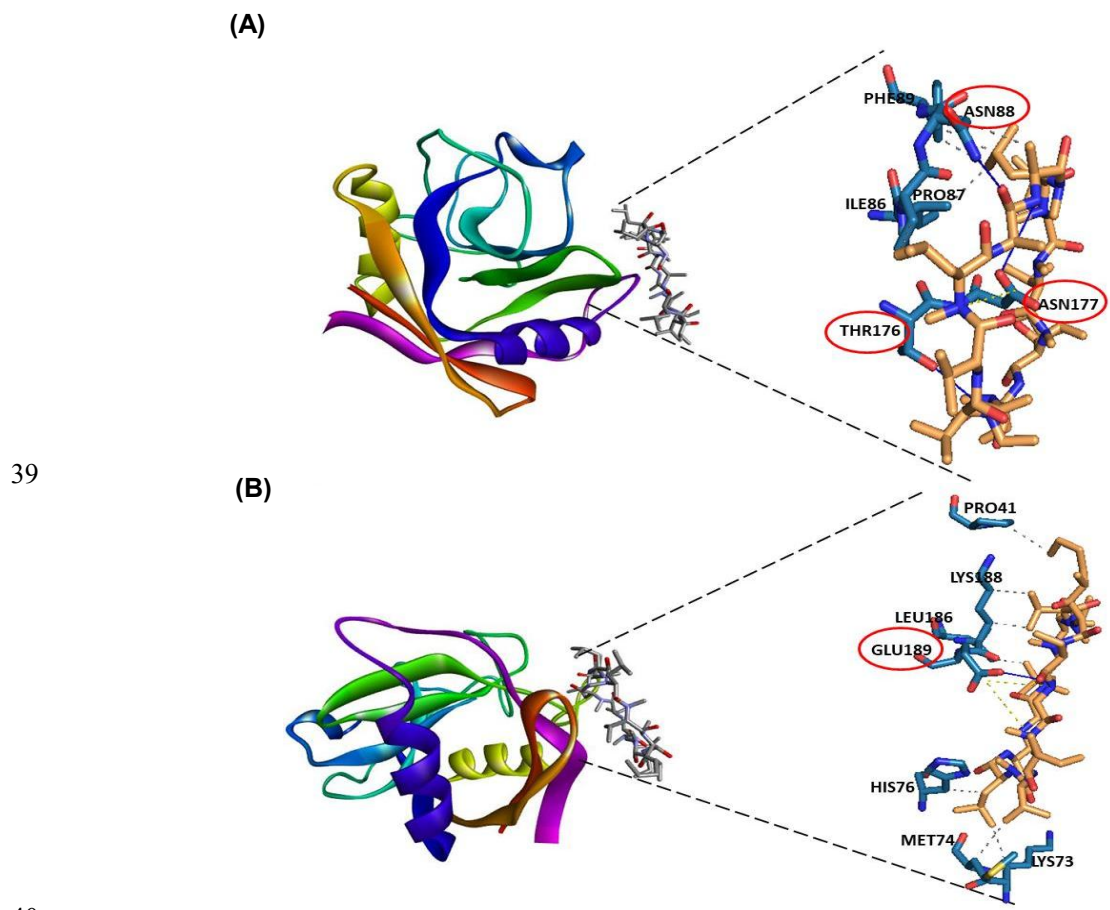

40

| Alisporivir- <i>PfCyclophilin 19B</i>  |         |     |                 |                 |                |               |                  |  |
|----------------------------------------|---------|-----|-----------------|-----------------|----------------|---------------|------------------|--|
| Min. binding energy=-5.72Kcal/mol      |         |     |                 |                 |                |               |                  |  |
| Index                                  | Residue | AA  | Distance<br>H-A | Distance<br>D-A | Donor<br>Angle | Donor<br>Atom | Acceptor<br>Atom |  |
| 1                                      | 88      | ASN | 1.63            | 2.64            | 174.63         | 574 [Nam]     | 1610 [O3]        |  |
| 2                                      | 176     | THR | 3.38            | 3.91            | 117.48         | 1400 [O3]     | 1568 [N3]        |  |
| 3                                      | 177     | ASP | 3.36            | 3.93            | 116.66         | 1580 [N3]     | 1410 [O2]        |  |
| CyclosporinA- <i>PfCyclophilin 19B</i> |         |     |                 |                 |                |               |                  |  |
| Min. binding energy=-5.27Kcal/mol      |         |     |                 |                 |                |               |                  |  |
| 1                                      | 189     | GLU | 2.24            | 2.8             | 115.78         | 1605 [O3]     | 1528 [O2]        |  |

41

42 **Supplementary Fig 2.** (A) The 3D ribbon model of alisporivir-*PfCyclophilin 19B* complex with  
 43 interacting residues of drug and protein (B) The 3D ribbon model of cyclosporinA-  
 44 *PfCyclophilin 19B* complex with interacting residues of drug and protein. Details of hydrogen  
 45 binding residues of cyclosporinA-*PfCyclophilin 19B* and alisporivir-*PfCyclophilin 19B* complex.

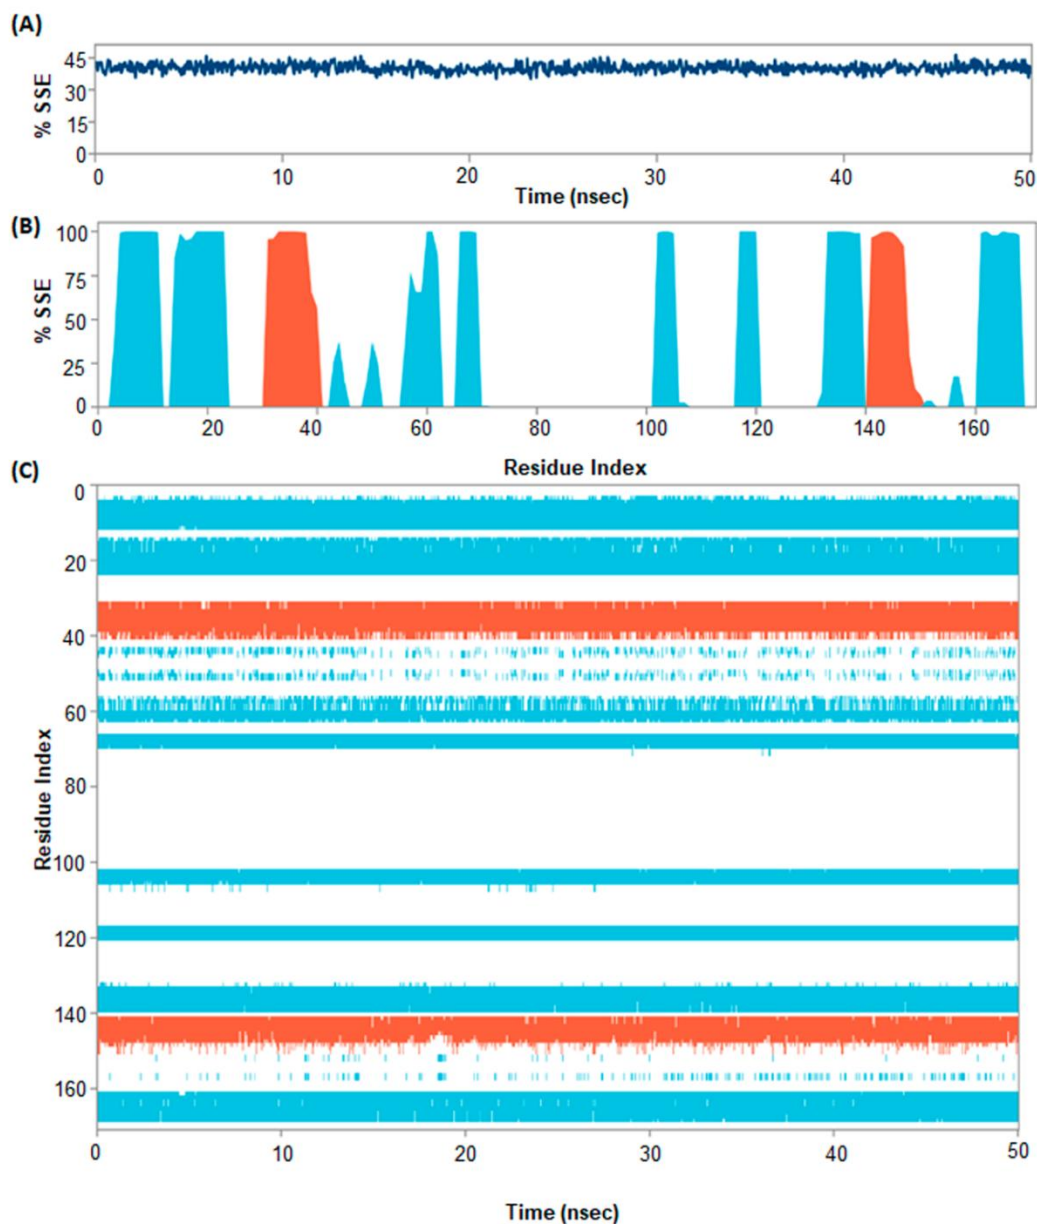

47

48 **Supplementary Fig 3.** Change in the overall secondary structure of *Pf*Cyclophilin 19B-  
 49 alisporivir complex during 50 ns simulation. (A) The plot summarizes the secondary structure  
 50 elements (SSE) composition for each trajectory frame over the course of the simulation. (B and  
 51 C) the plot monitors each residue and its SSE assignment over time.

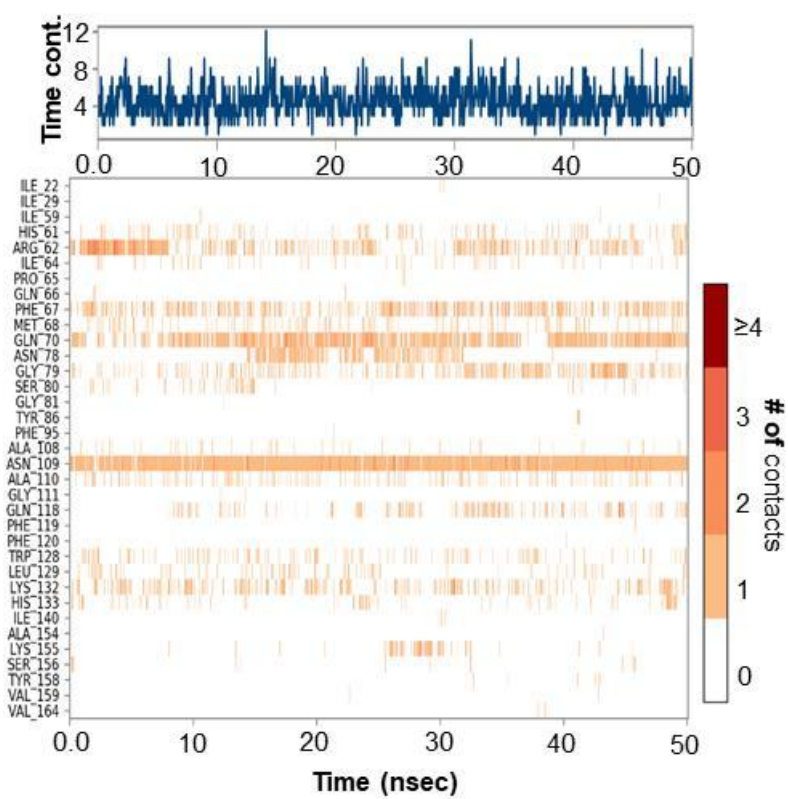

52

53 **Supplementary Fig 4.** Analysis of total contacts formed between *Pf*Cyclophilin 19B residues

54 and alisporivir during MD simulation.

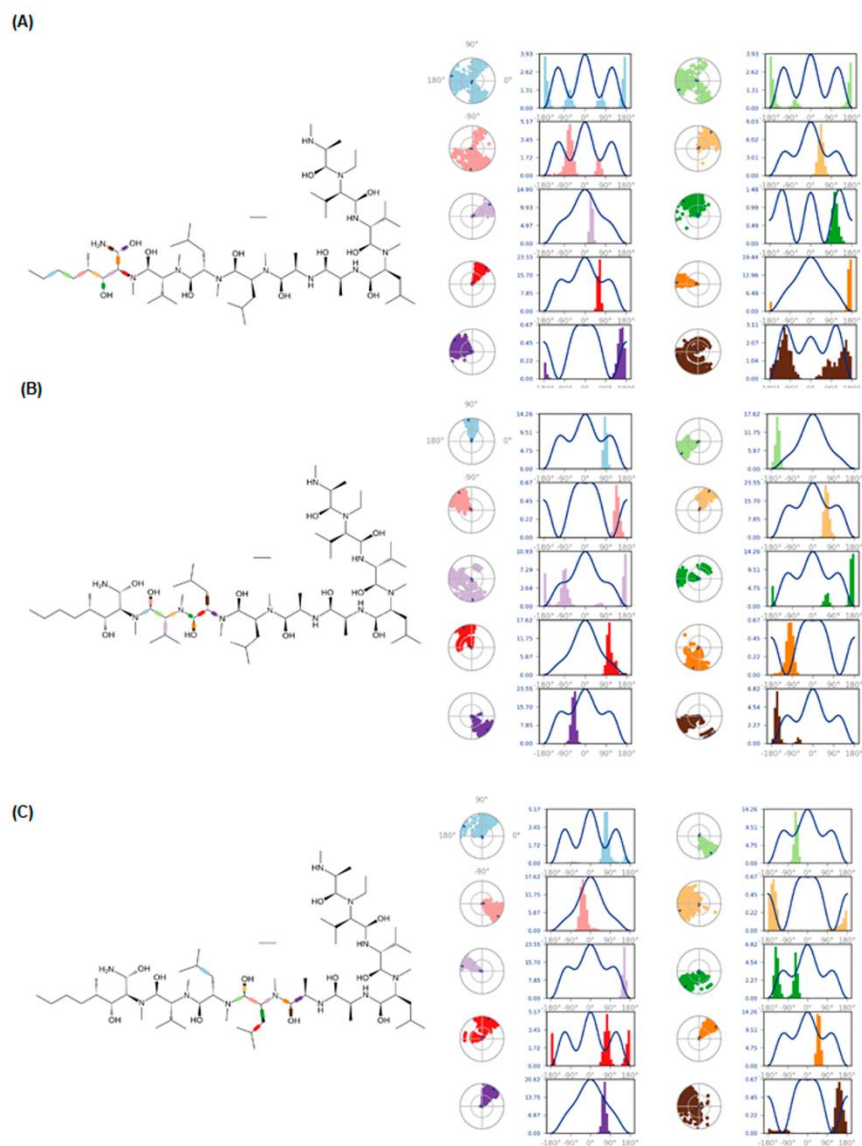

55

56 **Supplementary Fig 5.** Ligand alisporivir properties during simulation. (A, B and C). The  
 57 rotatable bonds in alisporivir has been showed in different colors in the alisporivir structure (ten  
 58 bonds at a time) is shown in left. Analysis of torsional degree of freedom during MD simulation  
 59 trajectory for the rotatable bonds present in the alisporivir. The dial plots of the angle of each  
 60 corresponding rotatable bond after simulations are displayed in the left, and the bar charts of the  
 61 torsional probability as a function of angle are shown in the right.

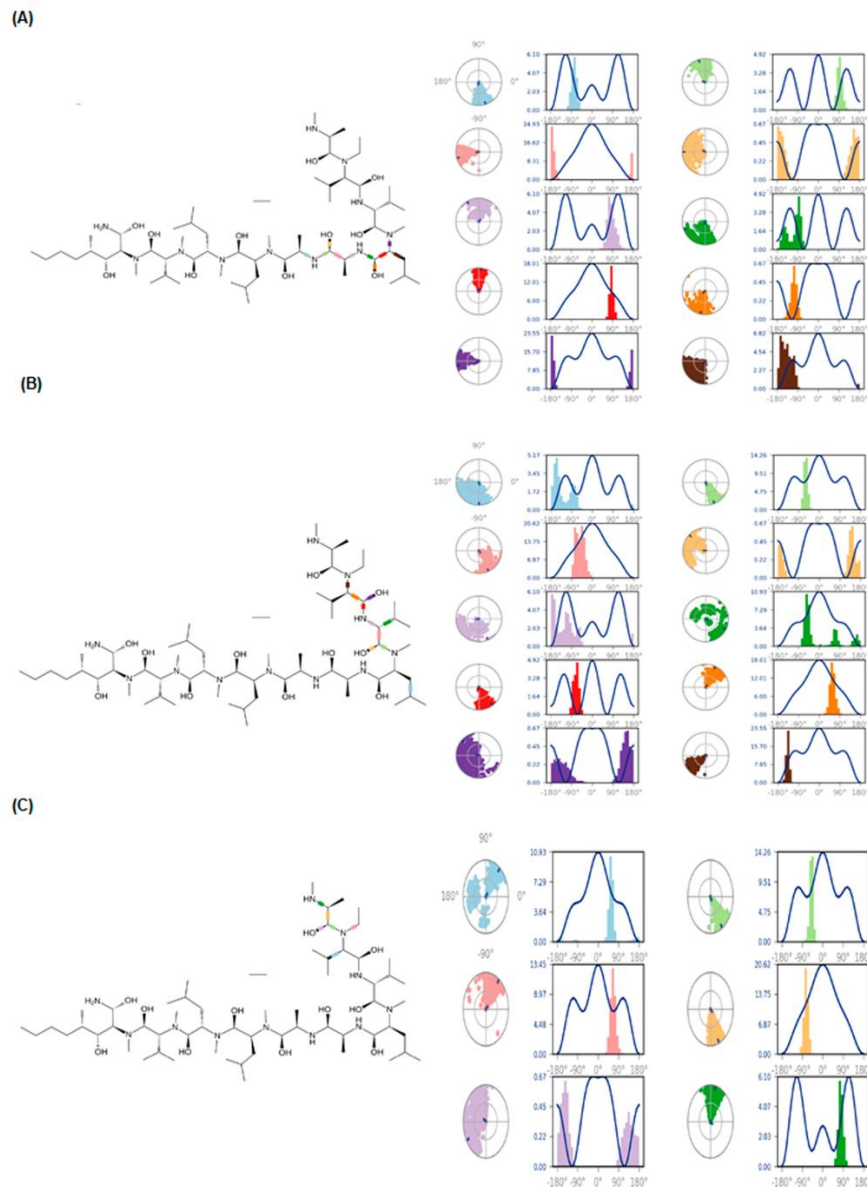

62

63 **Supplementary Fig 6.** Ligand alisporivir properties during simulation. (A, B and C). The  
 64 rotatable bonds in alisporivir has been showed in different colors in the alisporivir structure (ten  
 65 bonds at a time) is shown in left. Analysis of torsional degree of freedom during MD simulation  
 66 trajectory for the rotatable bonds present in the alisporivir. The dial plots of the angle of each  
 67 corresponding rotatable bond after simulations are displayed in the left, and the bar charts of the  
 68 torsional probability as a function of angle are shown in the right.

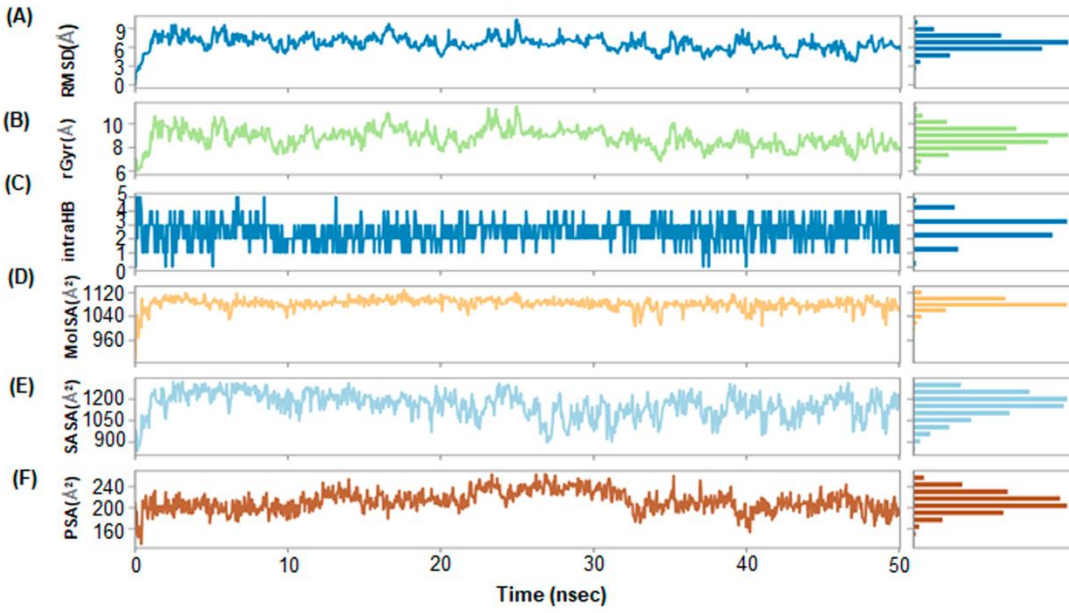

69

70 **Supplementary Fig 7.** Fluctuations in the alisporivir properties over 50 ns simulation. (A)  
 71 Ligand RMSD (B) Radius of gyration (C) Intramolecular Hydrogen Bonds (D) Molecular  
 72 surface area (E) Solvent accessible surface area (F) Polar surface area.

73

74

75

76

77

78
